# Supplementary material for: Pharmacotherapy for Dravet Syndrome: A Systematic Review and Network Meta-Analysis of Randomized Controlled Trials
Source: Springer Nature journal article supplement (doi:10.1007/s40265-023-01936-y), 2023-09-11
Supplement: MOESM1 [file 26028712]

## *Drugs - Electronic Supplementary Material*

### **Pharmacotherapy for Dravet Syndrome: A Systematic Review and Network Meta-Analysis of Randomized Controlled Trials**

Simona Lattanzi<sup>1</sup>, Eugen Trinka<sup>2-4</sup>, Emilio Russo<sup>5</sup>, Cinzia Del Giovane<sup>6,7</sup>, Sara Matricardi<sup>8</sup>,  
Stefano Meletti<sup>9,10</sup>, Pasquale Striano<sup>11</sup>, Payam Tabae Damavandi<sup>12</sup>, Mauro Silvestrini<sup>1</sup>,  
Francesco Brigo<sup>13</sup>

<sup>1</sup>Neurological Clinic, Department of Experimental and Clinical Medicine, Marche Polytechnic University, Via Conca 71, 60020 Ancona, Italy.

<sup>2</sup>Department of Neurology, Christian Doppler Klinik, Paracelsus Medical University, Salzburg, Austria.

<sup>3</sup>Center for Cognitive Neuroscience, Salzburg, Austria.

<sup>4</sup>Public Health, Health Services Research and HTA, University for Health Sciences, Medical Informatics and Technology, Hall i.T, Austria.

<sup>5</sup>Science of Health Department, University Magna Grecia of Catanzaro, Catanzaro, Italy.

<sup>6</sup>Department of Medical and Surgical Sciences for Children and Adults, University-Hospital of Modena and Reggio Emilia, Modena, Italy.

<sup>7</sup>Institute of Primary Health Care (BIHAM), University of Bern, Bern, Switzerland.

<sup>8</sup>Department of Pediatrics, University of Chieti, Chieti, Italy.

<sup>9</sup>Neurology Unit, OCB Hospital, AOU Modena, Modena, Italy.

<sup>10</sup>Department of Biomedical, Metabolic and Neural Science, Center for Neuroscience and Neurotechnology, University of Modena and Reggio Emilia, Modena, Italy.

<sup>11</sup>Pediatric Neurology and Muscular Diseases Unit, Department of Neurosciences, Rehabilitation, Ophthalmology, Genetics, Maternal and Child Health, "G. Gaslini" Institute, University of Genoa, Genova, Italy.

<sup>12</sup>Department of Neurology, Fondazione IRCCS San Gerardo, School of Medicine and Surgery and Milan Center for Neuroscience, University of Milano - Bicocca, Monza, Italy.

<sup>13</sup>Division of Neurology, "Franz Tappeiner" Hospital, Merano (BZ), Italy.

Correspondence to: Simona Lattanzi, Neurological Clinic, Department of Experimental and Clinical Medicine, Marche Polytechnic University, Ancona, Italy; e-mail: [alfierelattanzisimona@gmail.com](mailto:alfierelattanzisimona@gmail.com)

**p4: Table e-1. Risk of bias summary**

**p5: Table e-2. Definitions of convulsive seizures in the included trials**

**p6-7: Table e-3. Results of the pairwise meta-analyses for the study outcomes**

**p8-11: Figure e-1. Network meta-analysis of eligible comparisons for efficacy, tolerability, and global functioning**

**p12: Figure e-2. Interval plot for the efficacy outcome by drug dosages: seizure response**

**p13: Figure e-3. Interval plot for the efficacy outcome by drug dosages: seizure freedom**

**p14: Figure e-4. Interval plot for the tolerability outcome by drug dosages: discontinuation for any reason**

**p15: Figure e-5. Interval plot for the tolerability outcome by drug dosages: discontinuation for adverse events**

**p16: Figure e-6. Interval plot for the tolerability outcome by drug dosages: occurrence of adverse events**

**p17: Figure e-7. Interval plot for the tolerability outcome by drug dosages: occurrence of serious adverse events**

**p18: Figure e-8. Interval plot for the global functioning outcome by drug dosages: improvement at caregiver-reported Clinical Global Impression of Change**

**p19: Figure e-9. Interval plot for the efficacy outcome in trials with a maintenance period of at least 12 weeks: seizure response**

**p20: Figure e-10. Interval plot for the efficacy outcome in trials with a maintenance period of at least 12 weeks: seizure freedom**

**p21: Figure e-11. Interval plot for the tolerability outcome in trials with a maintenance period of at least 12 weeks: discontinuation for any reason**

**p22: Figure e-12. Interval plot for the tolerability outcome in trials with a maintenance period of at least 12 weeks: discontinuation for adverse events**

**p23: Figure e-13. Interval plot for the tolerability outcome in trials with a maintenance period of at least 12 weeks: occurrence of adverse events**

**p24: Figure e-14. Interval plot for the tolerability outcome in trials with a maintenance period of at least 12 weeks: occurrence of serious adverse events**

**p25: Figure e-15. Interval plot for the global functioning outcome in trials with a maintenance period of at least 12 weeks: improvement at caregiver-reported Clinical Global Impression of Change**

**p26: Appendix I. Search strategy**

**p27-29: Appendix II. Assessment of the confidence in the network estimates by study outcomes**

**p30: e-Reference**

**Table e-1. Risk of bias summary**

| <b>Study</b>                | <b>Random sequence generation<br/>(selection bias)</b> | <b>Allocation concealment<br/>(selection bias)</b> | <b>Blinding of participants and personnel<br/>(performance bias)</b> | <b>Blinding of outcome assessment<br/>(detection bias)</b> | <b>Incomplete outcome data<br/>(attrition bias)</b> | <b>Selective reporting<br/>(reporting bias)</b> |
|-----------------------------|--------------------------------------------------------|----------------------------------------------------|----------------------------------------------------------------------|------------------------------------------------------------|-----------------------------------------------------|-------------------------------------------------|
| <b>STICLO-France</b>        | Low risk                                               | Low risk                                           | Unclear risk                                                         | Unclear risk                                               | Low risk                                            | Low risk                                        |
| <b>STICLO-Italy</b>         | Low risk                                               | Low risk                                           | Unclear risk                                                         | Unclear risk                                               | Low risk                                            | Low risk                                        |
| <b>GWPCARE 1A</b>           | Low risk                                               | Low risk                                           | Low risk                                                             | Low risk                                                   | Low risk                                            | Low risk                                        |
| <b>GWPCARE 1B</b>           | Low risk                                               | Low risk                                           | Low risk                                                             | Low risk                                                   | Low risk                                            | Low risk                                        |
| <b>GWPCARE 2</b>            | Low risk                                               | Low risk                                           | Low risk                                                             | Low risk                                                   | Low risk                                            | Low risk                                        |
| <b>Lagae et al., 2019</b>   | Low risk                                               | Low risk                                           | Low risk                                                             | Low risk                                                   | Low risk                                            | Low risk                                        |
| <b>Nabbout et al., 2019</b> | Low risk                                               | Low risk                                           | Low risk                                                             | Low risk                                                   | Low risk                                            | Low risk                                        |
| <b>ELEKTRA</b>              | Low risk                                               | Low risk                                           | Low risk                                                             | Low risk                                                   | Low risk                                            | Low risk                                        |

**Table e-2. Definitions of convulsive seizures in the included trials**

| <b>Study</b>                | <b>Definition of convulsive seizures</b>                                                                                                                                                  |
|-----------------------------|-------------------------------------------------------------------------------------------------------------------------------------------------------------------------------------------|
| <b>STICLO-France</b>        | Generalized tonic-clonic, clonic seizures                                                                                                                                                 |
| <b>STICLO-Italy</b>         | Generalized tonic-clonic, clonic seizures                                                                                                                                                 |
| <b>GWPCARE1 Part A</b>      | Tonic-clonic, tonic, clonic, atonic seizures                                                                                                                                              |
| <b>GWPCARE1 Part B</b>      | Tonic-clonic, tonic, clonic, atonic seizures                                                                                                                                              |
| <b>GWPCARE2</b>             | Tonic-clonic, tonic, clonic, atonic seizures                                                                                                                                              |
| <b>Lagae et al., 2019</b>   | Hemi-clonic, tonic, clonic, tonic-atonic, generalised tonic-clonic, focal with clearly observable motor signs                                                                             |
| <b>Nabbout et al., 2019</b> | Hemi-clonic, tonic, clonic, tonic-atonic, generalized tonic-clonic, secondarily generalized tonic-clonic [focal to bilateral tonic-clonic], and focal with clearly observable motor signs |
| <b>ELEKTRA</b>              | Generalized tonic-clonic, focal to bilateral tonic-clonic, hemi-clonic, bilateral clonic (generalized clonic), and convulsive status epilepticus seizures                                 |

**Table e-3. Results of the pairwise meta-analyses for the study outcomes**

| Comparison                                          | Number of studies | Number of pooled events/participants |                                 | I <sup>2</sup> | Odds Ratio (95% CI)   | p value |
|-----------------------------------------------------|-------------------|--------------------------------------|---------------------------------|----------------|-----------------------|---------|
|                                                     |                   | 1 <sup>st</sup> treatment group      | 2 <sup>nd</sup> treatment group |                |                       |         |
| <b>Seizure response</b>                             |                   |                                      |                                 |                |                       |         |
| STP vs. placebo                                     | 2                 | 23/33                                | 2/31                            | 0.0%           | 31.75 (6.25-161.16)   | <0.001  |
| CBD vs. placebo                                     | 2                 | 88/194                               | 33/124                          | 0.0%           | 2.26 (1.38-3.70)      | 0.001   |
| FFA vs. placebo                                     | 2                 | 65/122                               | 7/84                            | 27.4%          | 11.24 (4.76-26.54)    | <0.001  |
| Soticlestat vs. placebo                             | 1                 | 8/26                                 | 0/25                            | -              | 23.43 (1.27-423.00)   | 0.034   |
| <b>Seizure freedom</b>                              |                   |                                      |                                 |                |                       |         |
| STP vs. placebo                                     | 2                 | 13/33                                | 0/31                            | 0.0%           | 19.86 (2.40-164.45)   | 0.006   |
| CBD vs. placebo                                     | 2                 | 7/194                                | 1/124                           | 0.0%           | 3.12 (0.53-18.45)     | 0.209   |
| FFA vs. placebo                                     | 2                 | 7/122                                | 0/84                            | 0.0%           | 4.96 (0.57-42.89)     | 0.146   |
| Soticlestat vs. placebo                             | 1                 | 1/26                                 | 0/25                            | -              | 3.00 (0.12-77.17)     | 0.507   |
| <b>Treatment discontinuation</b>                    |                   |                                      |                                 |                |                       |         |
| STP vs. placebo                                     | 2                 | 2/33                                 | 6/31                            | 0.0%           | 0.27 (0.05-1.51)      | 0.138   |
| CBD vs. placebo                                     | 3                 | 20/221                               | 3/131                           | 0.0%           | 3.49 (1.11-10.95)     | 0.032   |
| FFA vs. placebo                                     | 2                 | 13/122                               | 6/84                            | 0.0%           | 1.65 (0.60-4.55)      | 0.332   |
| Soticlestat vs. placebo                             | 1                 | 2/26                                 | 3/25                            | -              | 0.61 (0.09-4.01)      | 0.608   |
| <b>Treatment discontinuation for adverse events</b> |                   |                                      |                                 |                |                       |         |
| STP vs. placebo                                     | 2                 | 1/33                                 | 1/31                            | 0.0%           | 0.94 (0.09-9.54)      | 0.957   |
| CBD vs. placebo                                     | 3                 | 15/221                               | 1/131                           | 0.0%           | 5.18 (1.15-23.23)     | 0.032   |
| FFA vs. placebo                                     | 2                 | 7/122                                | 1/84                            | 0.0%           | 3.23 (0.50-20.96)     | 0.220   |
| Soticlestat vs. placebo                             | 1                 | 1/26                                 | 1/25                            | -              | 0.96 (0.06-16.23)     | 0.977   |
| <b>At least one adverse event</b>                   |                   |                                      |                                 |                |                       |         |
| STP vs. placebo                                     | 1                 | 21/21                                | 5/20                            | -              | 121.18 (6.23-2356.89) | 0.002   |
| CBD vs. placebo                                     | 3                 | 195/221                              | 108/131                         | 64.9%          | 1.52 (0.41-5.68)      | 0.189   |
| FFA vs. placebo                                     | 2                 | 117/122                              | 68/84                           | 26.7%          | 7.37 (2.52-21.60)     | <0.001  |
| <b>At least one serious adverse event</b>           |                   |                                      |                                 |                |                       |         |
| STP vs. placebo                                     | 2                 | 2/33                                 | 3/31                            | 0.0%           | 0.65 (0.12-3.61)      | 0.619   |
| CBD vs. placebo                                     | 3                 | 44/221                               | 14/131                          | 0.0%           | 1.88 (0.98-3.62)      | 0.057   |
| FFA vs. placebo                                     | 2                 | 15/122                               | 11/84                           | 0.0%           | 0.99 (0.42-2.33)      | 0.978   |

**Improvement at the C-CGIC**

|                         |   |         |        |      |                  |        |
|-------------------------|---|---------|--------|------|------------------|--------|
| CBD vs. placebo         | 2 | 122/192 | 47/123 | 0.0% | 2.74 (1.71-4.39) | <0.001 |
| FFA vs. placebo         | 2 | 74/122  | 28/84  | 0.0% | 3.14 (1.74-5.68) | <0.001 |
| Soticlestat vs. placebo | 1 | 15/26   | 8/25   | -    | 2.90 (0.92-9.11) | 0.069  |

An odds ratio greater than 1 indicates increased likelihood of the outcome being achieved in the first than in the second treatment group of each comparison. Abbreviations: CBD=pharmaceutical-grade cannabidiol, C-CGIC=Caregiver-reported Clinical Global Impression of Change, FFA=fenfluramine hydrochloride, PBO=placebo, STP=stiripentol.

**Figure e-1. Network meta-analysis of eligible comparisons for efficacy, tolerability, and global functioning**

**A) Seizure response**

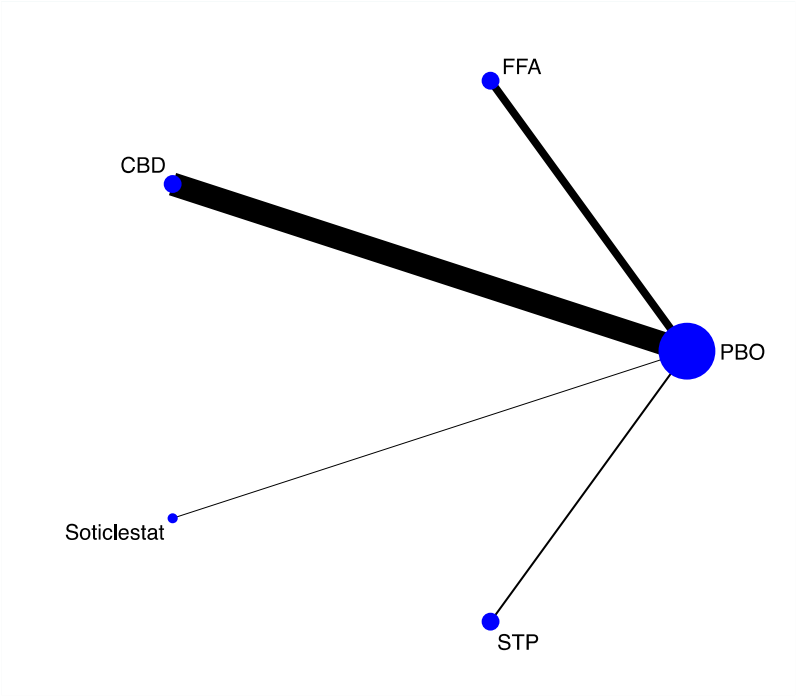

**B) Seizure freedom**

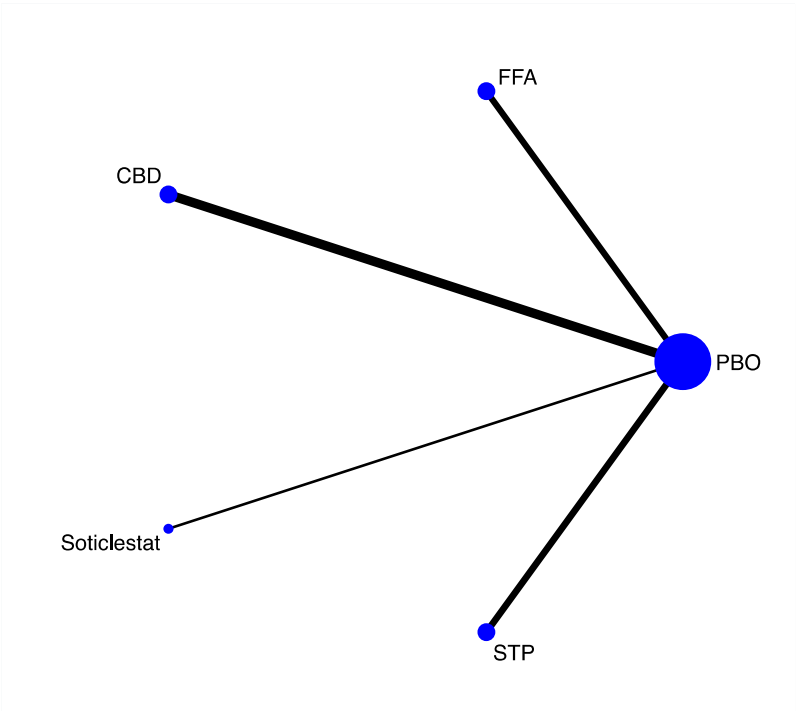



**C) Treatment discontinuation**

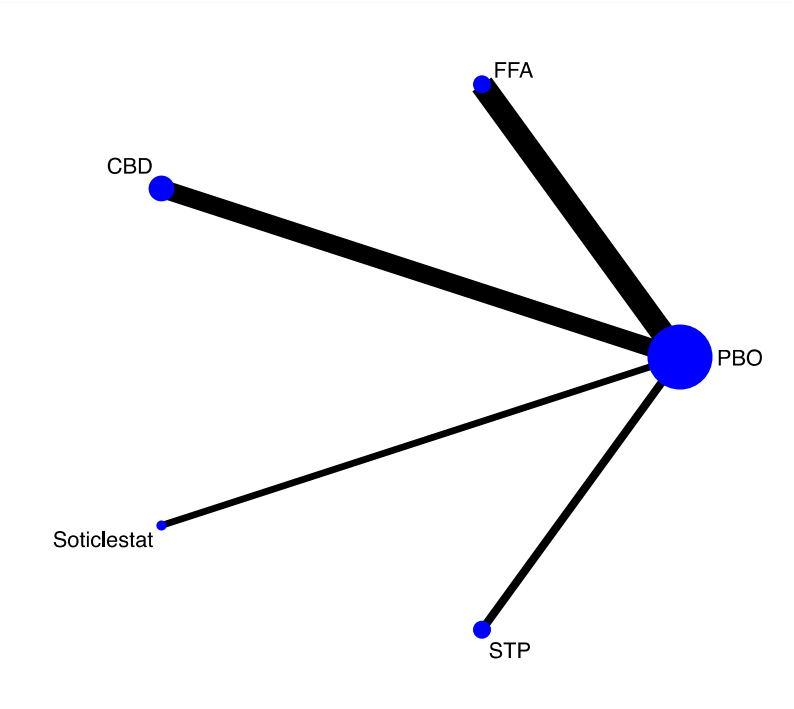

**D) Treatment discontinuation for adverse events**

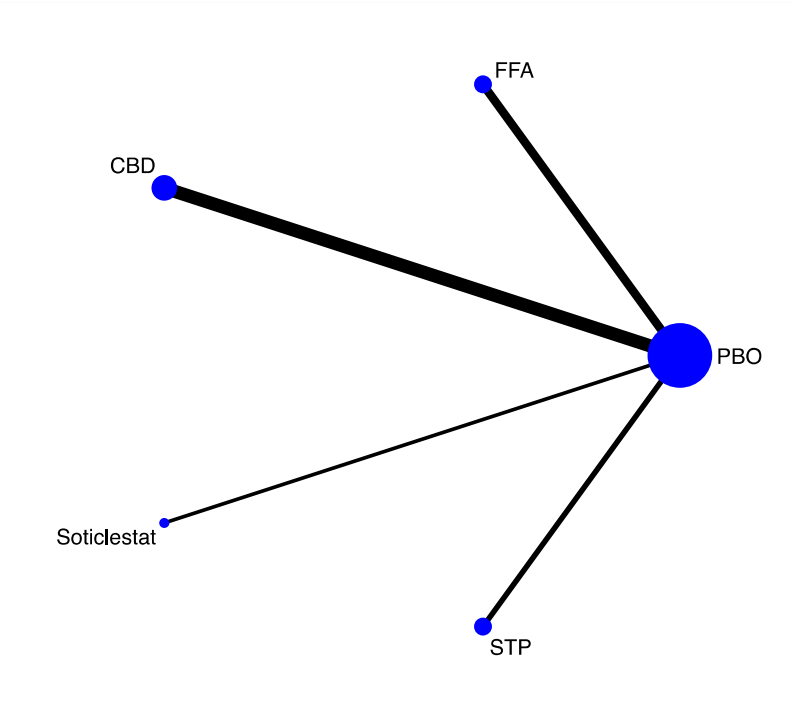

**E) At least one adverse event**

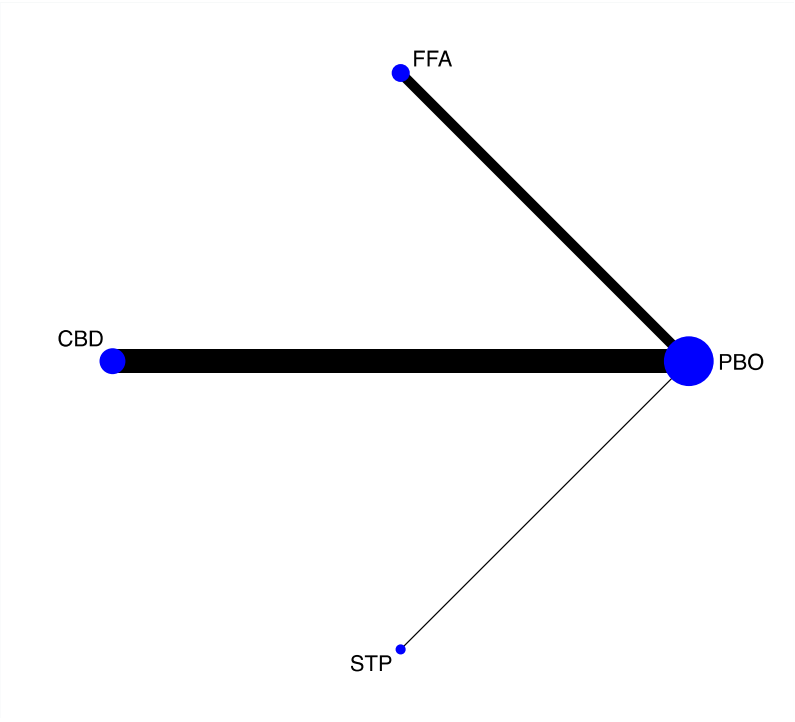

**F) At least one serious adverse event**

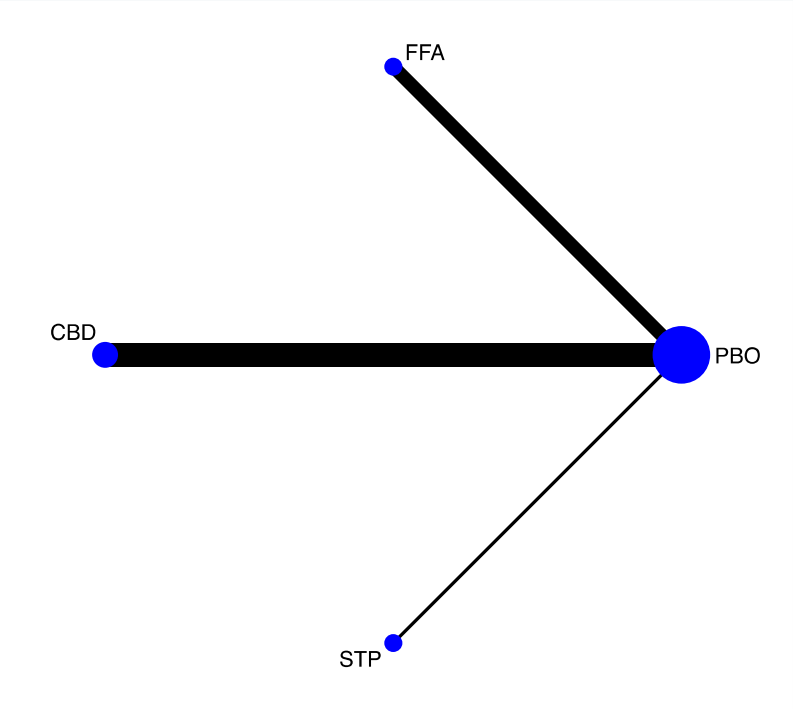

### G) Improvement at the Caregiver-reported Clinical Global Impression of Change

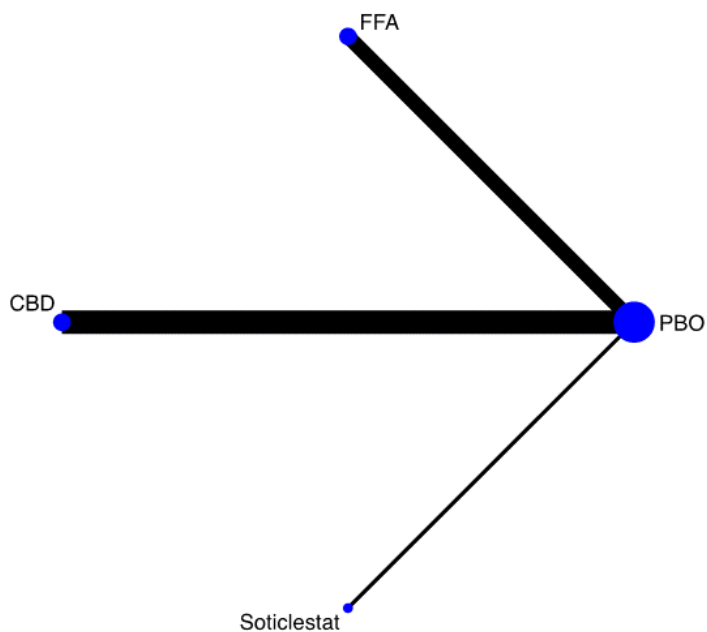

The width of the lines is proportional to the inverse of the variance of the comparison treatment effect and the size of every circle is proportional to the number of randomly assigned participants. Abbreviations: CBD=pharmaceutical-grade cannabidiol, FFA=fenfluramine hydrochloride, PBO=placebo, STP=stiripentol.

**Figure e-2. Interval plot for the efficacy outcome by drug dosages: seizure response**

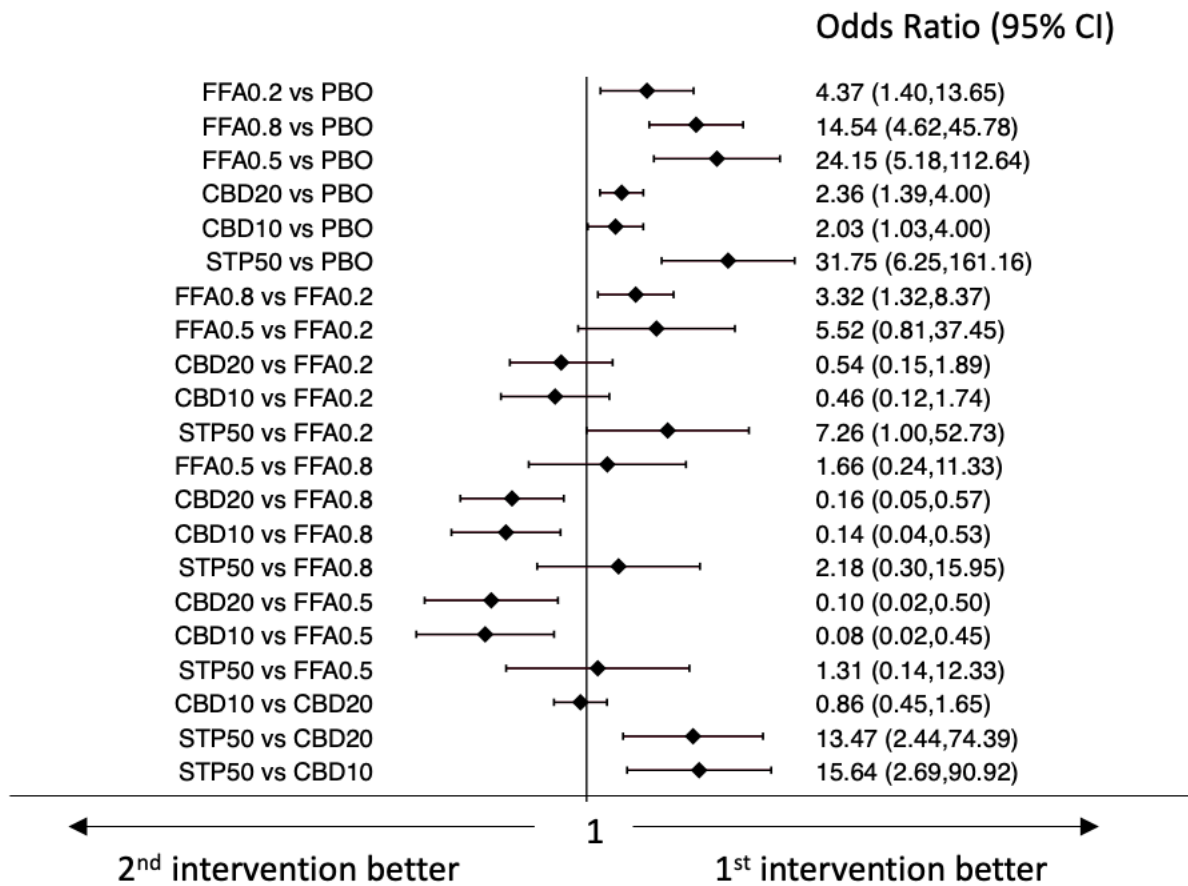

Abbreviations: CBD10=pharmaceutical-grade cannabidiol 10 mg/kg/day, CBD20=pharmaceutical-grade cannabidiol 20 mg/kg/day, CI=confidence interval, FFA0.2=fenfluramine hydrochloride 0.2 mg/kg/day, FFA0.5=fenfluramine hydrochloride 0.5 mg/kg/day, FFA0.8=fenfluramine hydrochloride 0.8 mg/kg/day, PBO=placebo, STP50=stiripentol 50 mg/kg/day.

**Figure e-3. Interval plot for the efficacy outcome by drug dosages: seizure freedom**

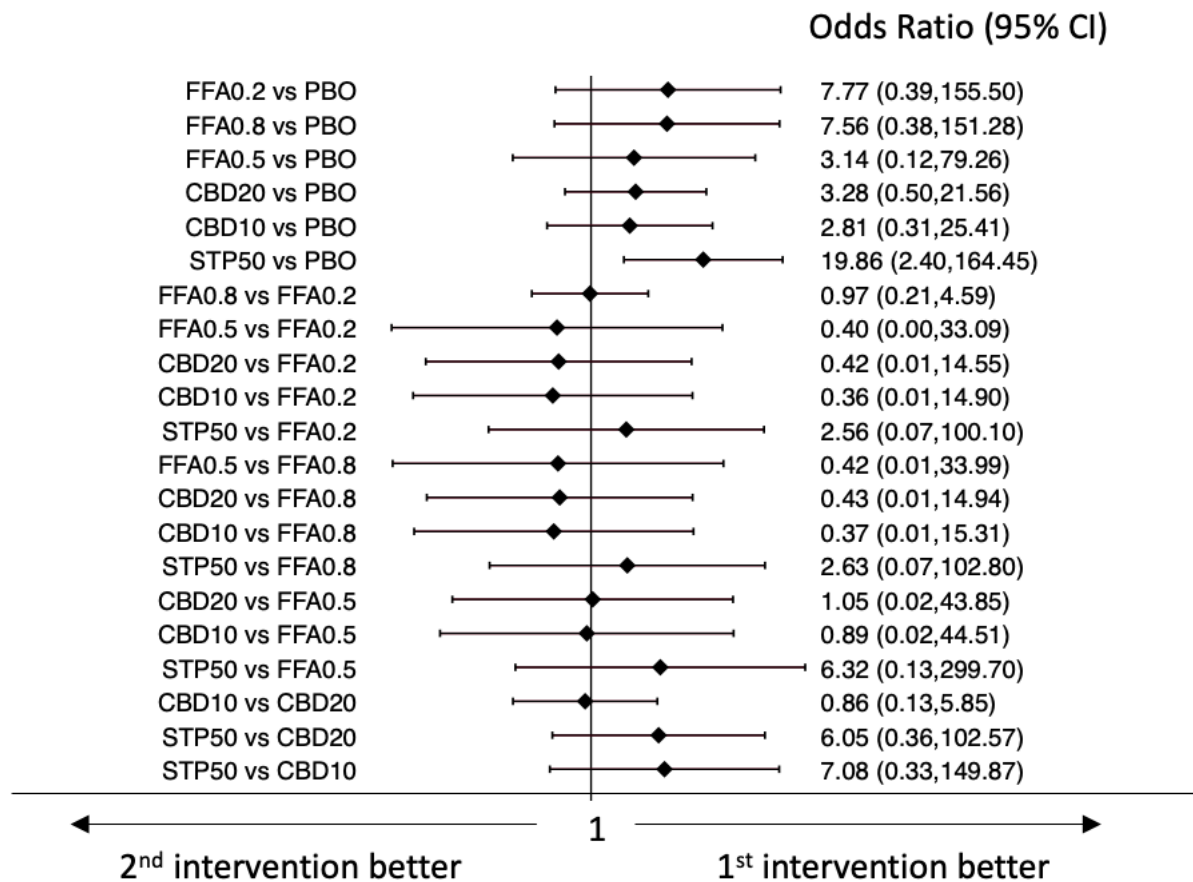

Abbreviations: CBD10=pharmaceutical-grade cannabidiol 10 mg/kg/day, CBD20=pharmaceutical-grade cannabidiol 20 mg/kg/day, CI=confidence interval, FFA0.2=fenfluramine hydrochloride 0.2 mg/kg/day, FFA0.5=fenfluramine hydrochloride 0.5 mg/kg/day, FFA0.8=fenfluramine hydrochloride 0.8 mg/kg/day, PBO=placebo, STP50=stiripentol 50 mg/kg/day.

**Figure e-4. Interval plot for the tolerability outcome by drug dosages: discontinuation for any reason**

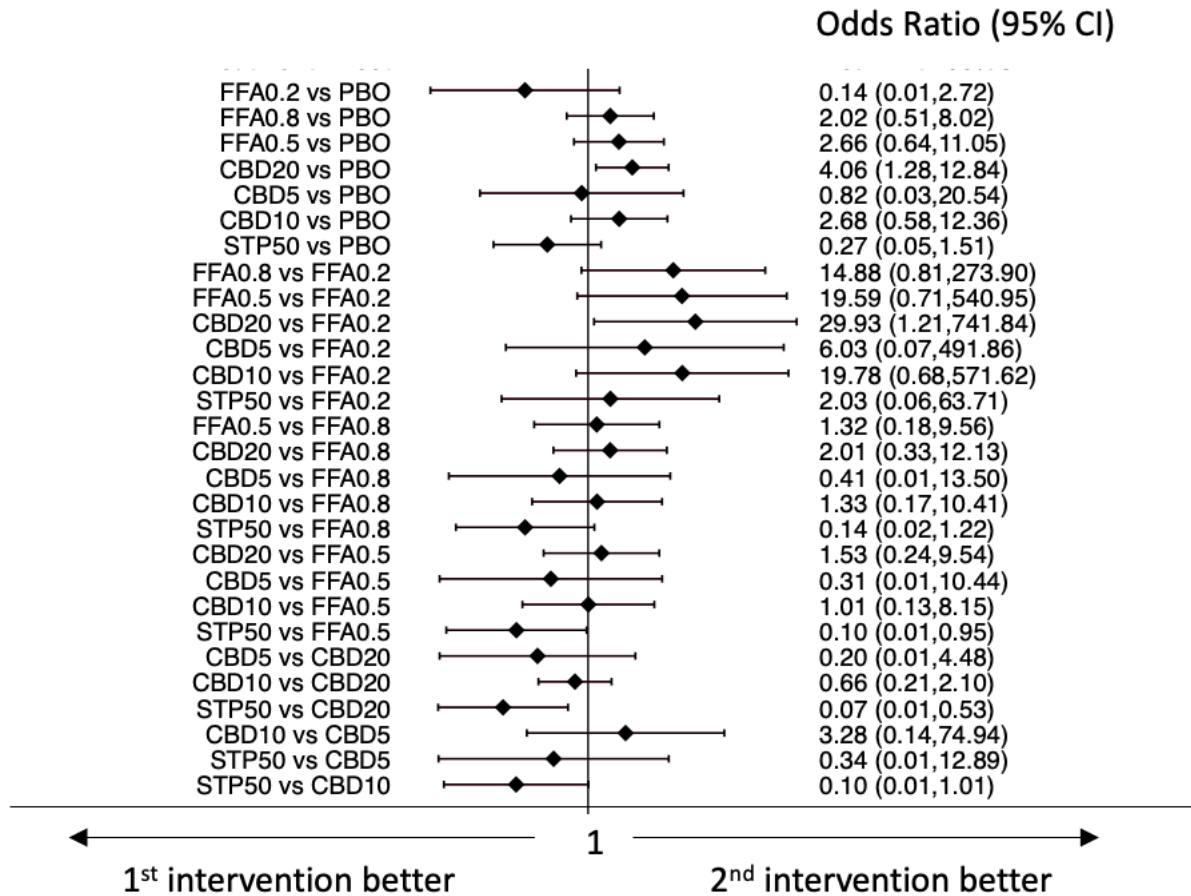

Abbreviations: CBD5=pharmaceutical-grade cannabidiol 0.5 mg/kg/day, CBD10=pharmaceutical-grade cannabidiol 10 mg/kg/day, CBD20=pharmaceutical-grade cannabidiol 20 mg/kg/day, CI=confidence interval, FFA0.2=fenfluramine hydrochloride 0.2 mg/kg/day, FFA0.5=fenfluramine hydrochloride 0.5 mg/kg/day, FFA0.8=fenfluramine hydrochloride 0.8 mg/kg/day, PBO=placebo, STP50=stiripentol 50 mg/kg/day.

**Figure e-5. Interval plot for the tolerability outcome by drug dosages: discontinuation for adverse events**

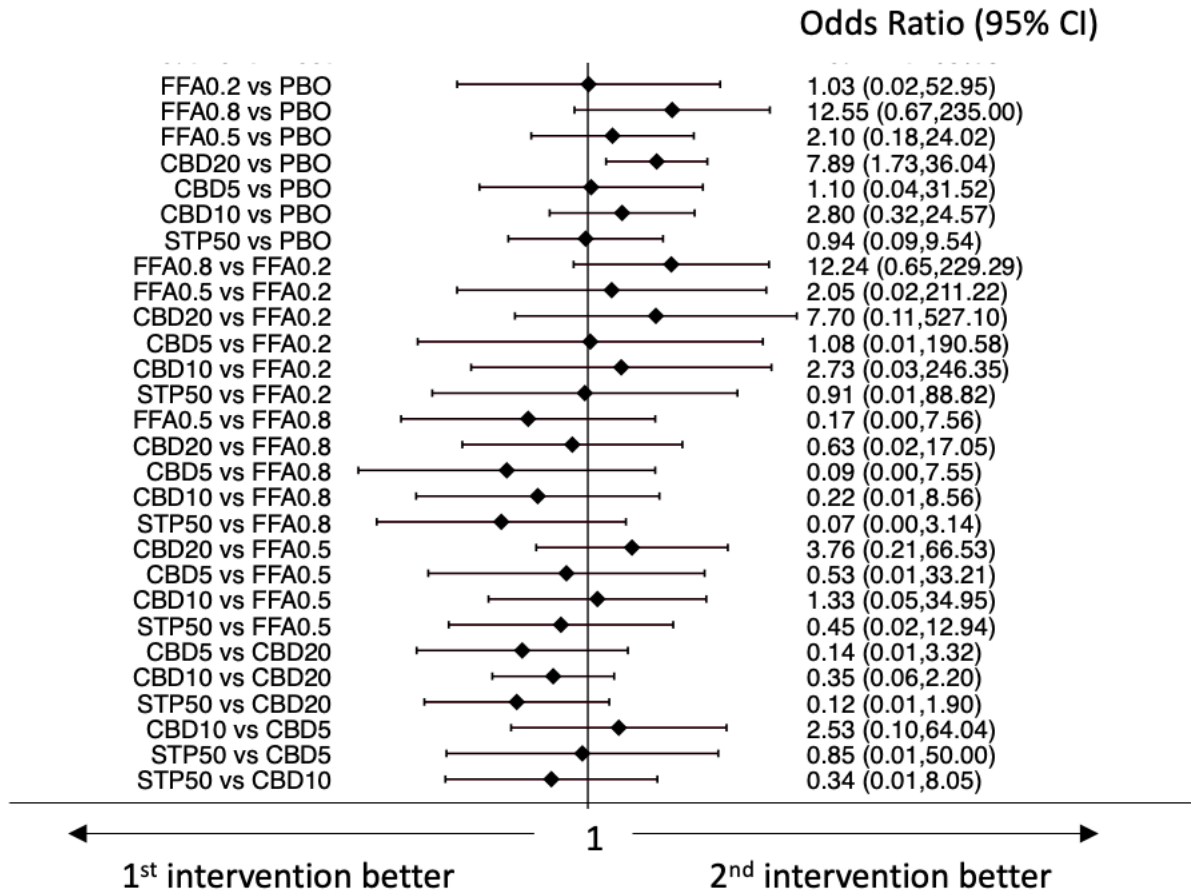

Abbreviations: CBD5=pharmaceutical-grade cannabidiol 0.5 mg/kg/day, CBD10=pharmaceutical-grade cannabidiol 10 mg/kg/day, CBD20=pharmaceutical-grade cannabidiol 20 mg/kg/day, CI=confidence interval, FFA0.2=fenfluramine hydrochloride 0.2 mg/kg/day, FFA0.5=fenfluramine hydrochloride 0.5 mg/kg/day, FFA0.8=fenfluramine hydrochloride 0.8 mg/kg/day, PBO=placebo, STP50=stiripentol 50 mg/kg/day.

**Figure e-6. Interval plot for the tolerability outcome by drug dosages: occurrence of adverse events**

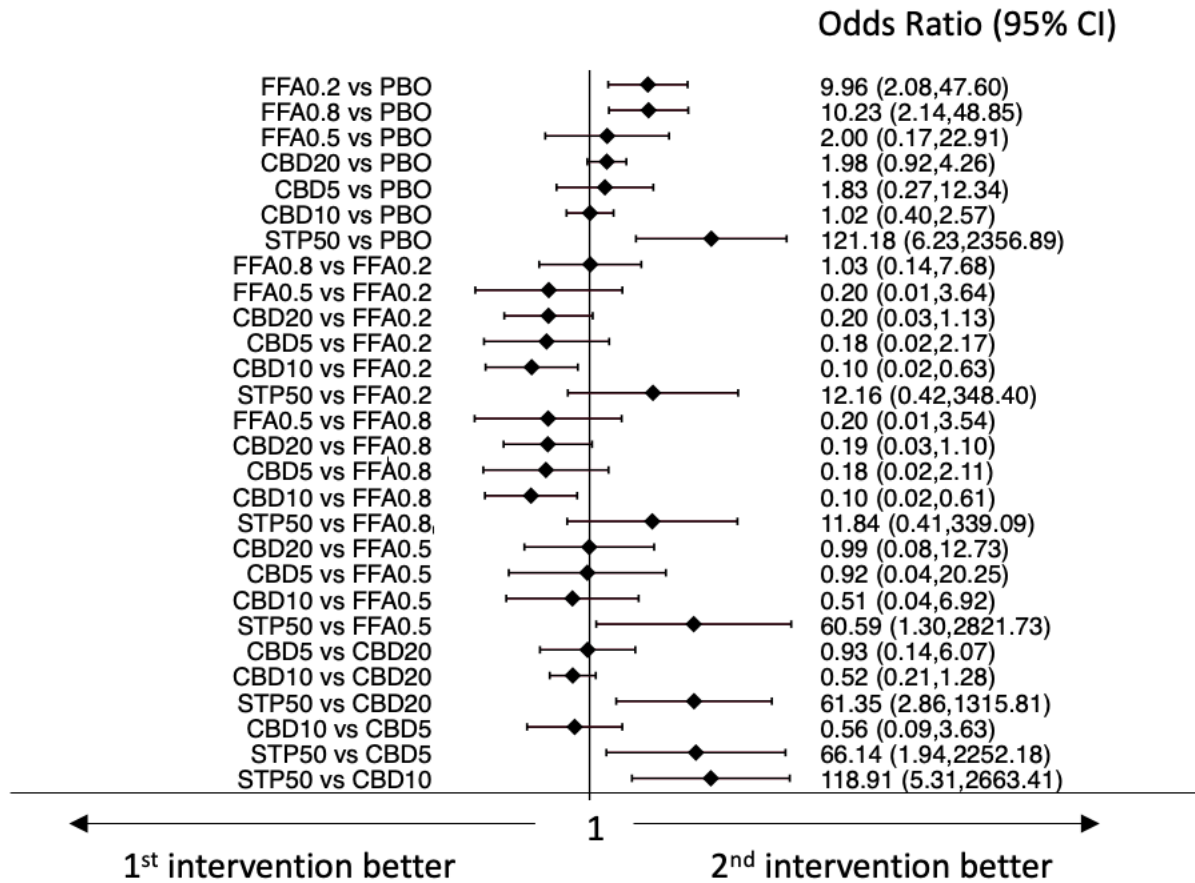

Abbreviations: CBD5=pharmaceutical-grade cannabidiol 0.5 mg/kg/day, CBD10=pharmaceutical-grade cannabidiol 10 mg/kg/day, CBD20=pharmaceutical-grade cannabidiol 20 mg/kg/day, CI=confidence interval, FFA0.2=fenfluramine hydrochloride 0.2 mg/kg/day, FFA0.5=fenfluramine hydrochloride 0.5 mg/kg/day, FFA0.8=fenfluramine hydrochloride 0.8 mg/kg/day, PBO=placebo, STP50=stiripentol 50 mg/kg/day.



**Figure e-7. Interval plot for the tolerability outcome by drug dosages: occurrence of serious adverse events**

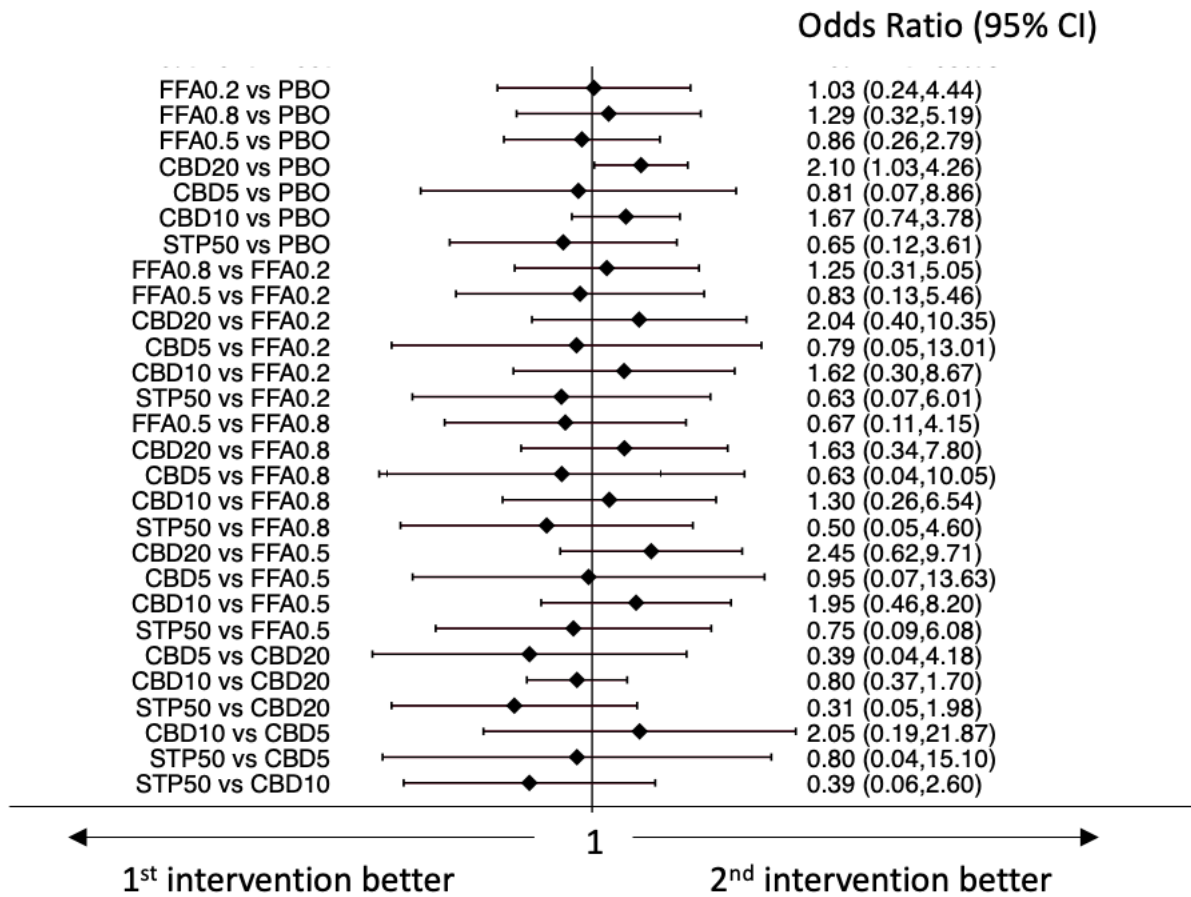

Abbreviations: CBD5=pharmaceutical-grade cannabidiol 0.5 mg/kg/day, CBD10=pharmaceutical-grade cannabidiol 10 mg/kg/day, CBD20=pharmaceutical-grade cannabidiol 20 mg/kg/day, CI=confidence interval, FFA0.2=fenfluramine hydrochloride 0.2 mg/kg/day, FFA0.5=fenfluramine hydrochloride 0.5 mg/kg/day, FFA0.8=fenfluramine hydrochloride 0.8 mg/kg/day, PBO=placebo, STP50=stiripentol 50 mg/kg/day.

**Figure e-8. Interval plot for the global functioning outcome by drug dosages: improvement at caregiver-reported Clinical Global Impression of Change**

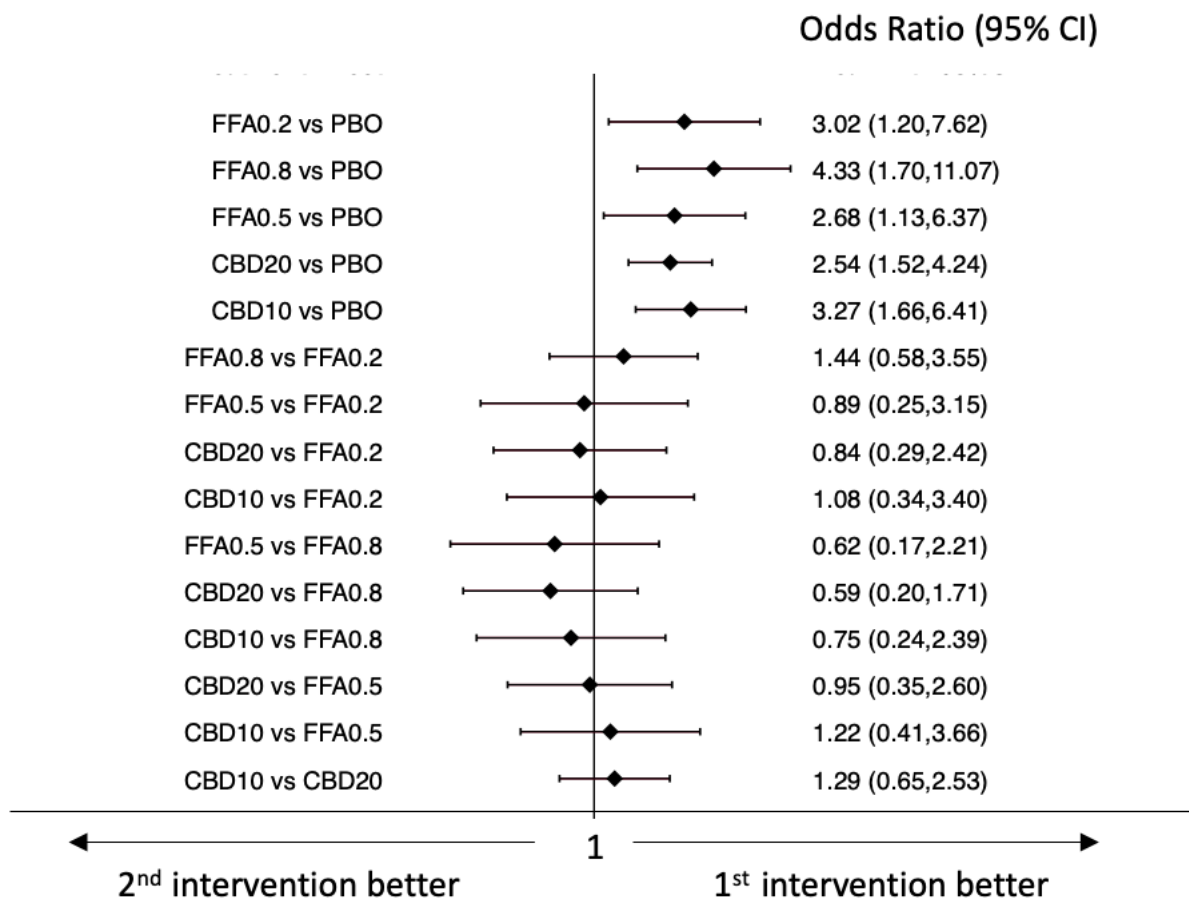

Abbreviations: CBD10=pharmaceutical-grade cannabidiol 10 mg/kg/day, CBD20=pharmaceutical-grade cannabidiol 20 mg/kg/day, CI=confidence interval, FFA0.2=fenfluramine hydrochloride 0.2 mg/kg/day, FFA0.5=fenfluramine hydrochloride 0.5 mg/kg/day, FFA0.8=fenfluramine hydrochloride 0.8 mg/kg/day, PBO=placebo.

**Figure e-9. Interval plot for the efficacy outcome in trials with a maintenance period of at least 12 weeks: seizure response**

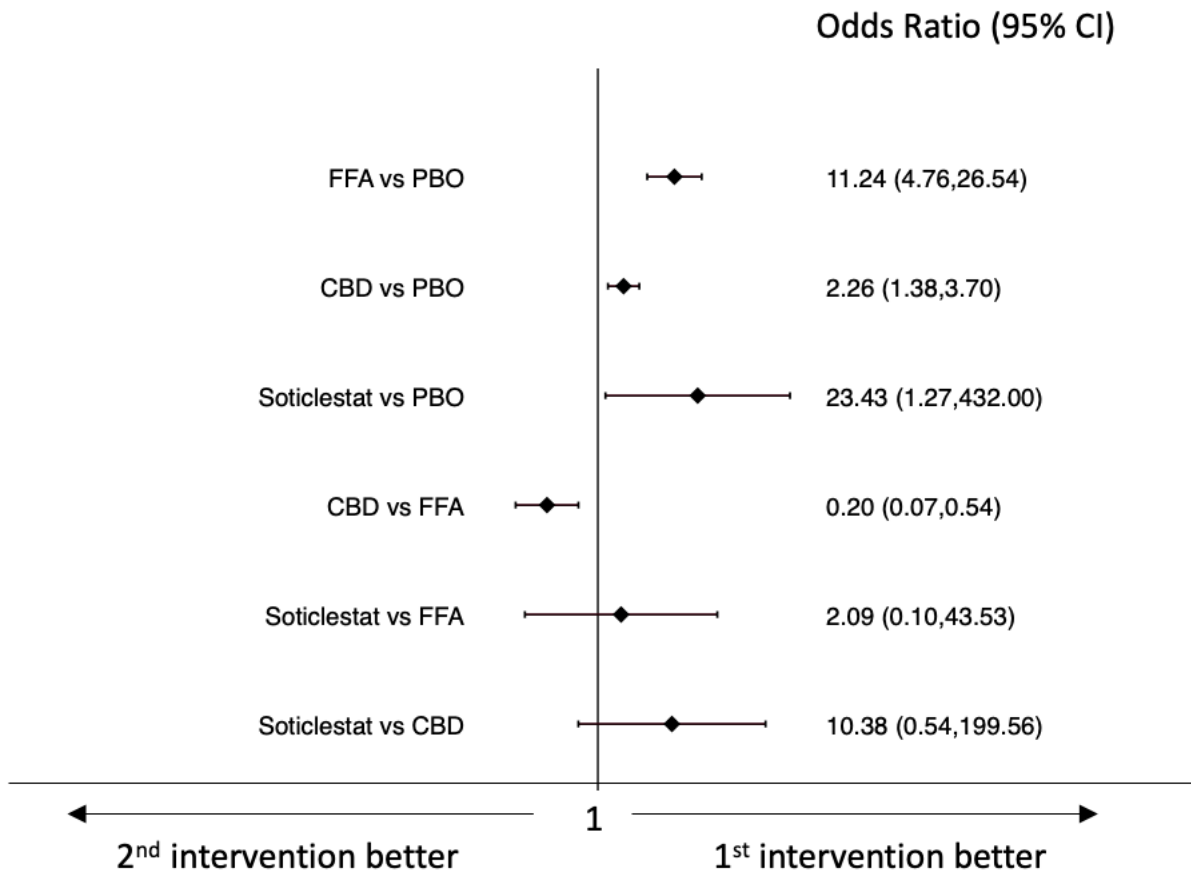

Abbreviations: CBD=pharmaceutical-grade cannabidiol, CI=confidence interval, FFA=fenfluramine hydrochloride, PBO=placebo.

**Figure e-10. Interval plot for the efficacy outcome in trials with a maintenance period of at least 12 weeks: seizure freedom**

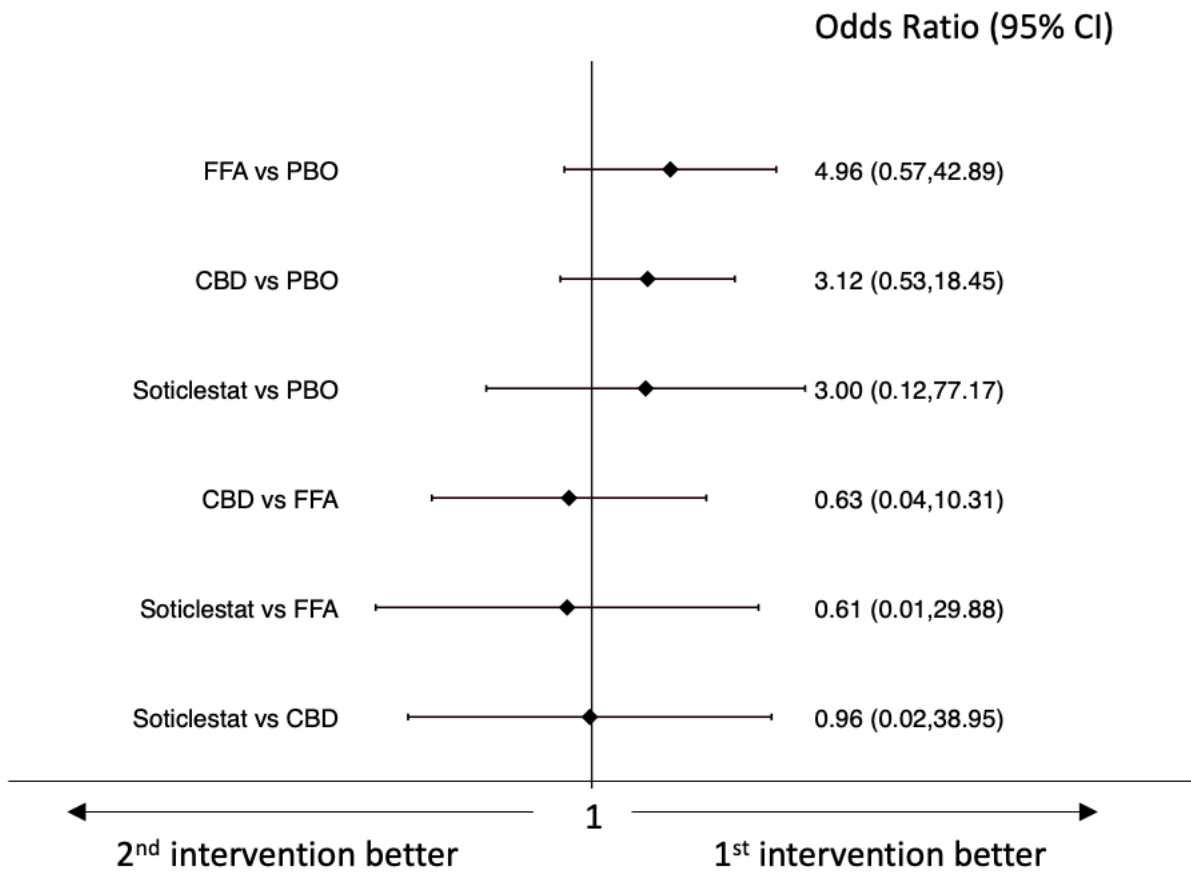

Abbreviations: CBD=pharmaceutical-grade cannabidiol, CI=confidence interval, FFA=fenfluramine hydrochloride, PBO=placebo.

**Figure e-11. Interval plot for the tolerability outcome in trials with a maintenance period of at least 12 weeks: discontinuation for any reason**

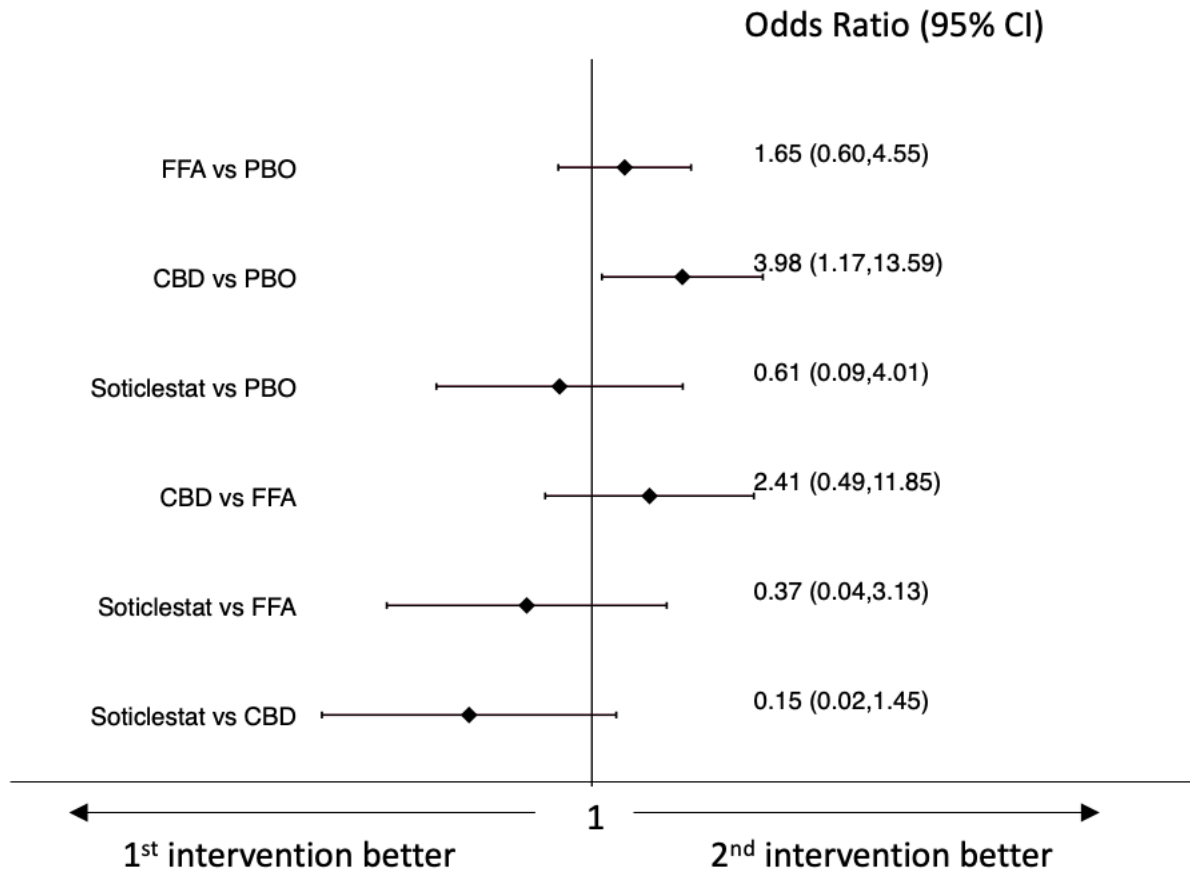

Abbreviations: CBD=pharmaceutical-grade cannabidiol, CI=confidence interval, FFA=fenfluramine hydrochloride, PBO=placebo.

**Figure e-12. Interval plot for the tolerability outcome in trials with a maintenance period of at least 12 weeks: discontinuation for adverse events**

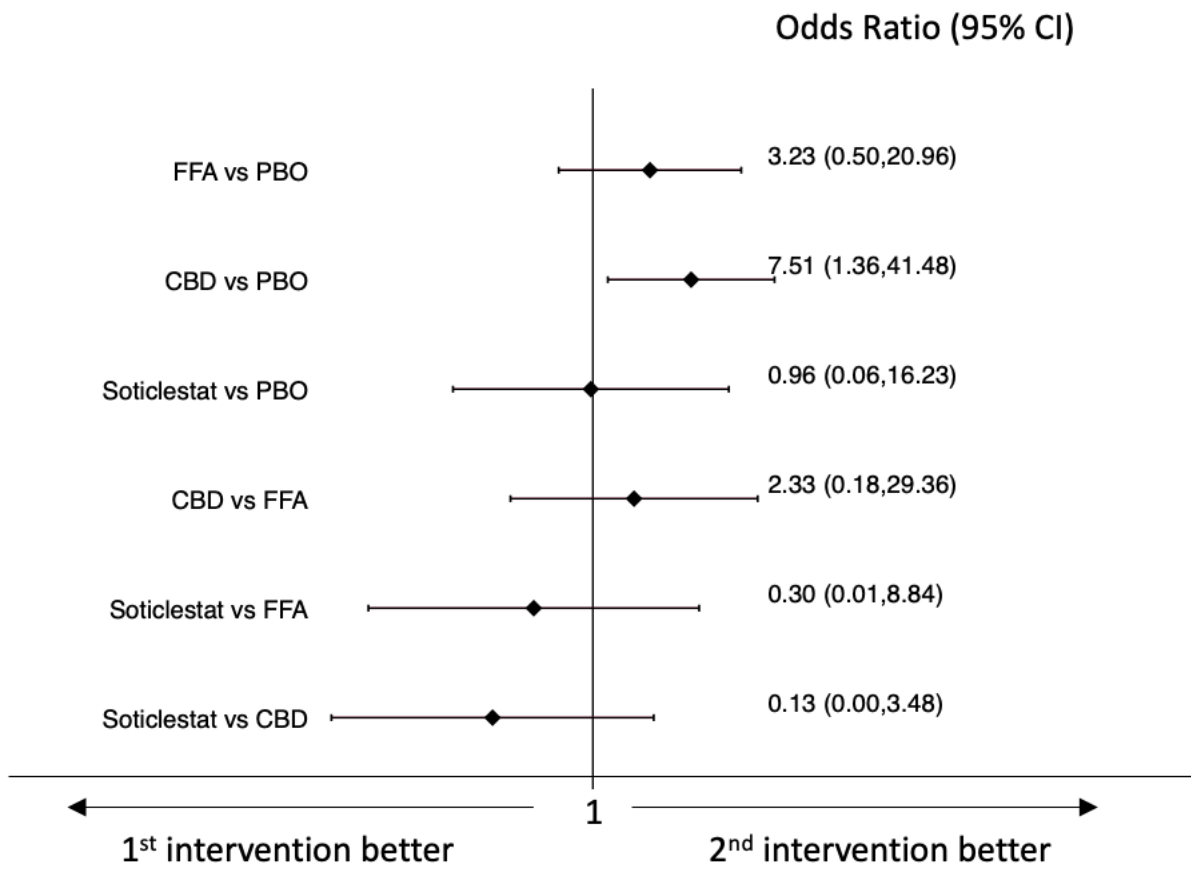

Abbreviations: CBD=pharmaceutical-grade cannabidiol, CI=confidence interval, FFA=fenfluramine hydrochloride, PBO=placebo.

**Figure e-13. Interval plot for the tolerability outcome in trials with a maintenance period of at least 12 weeks: occurrence of adverse events**

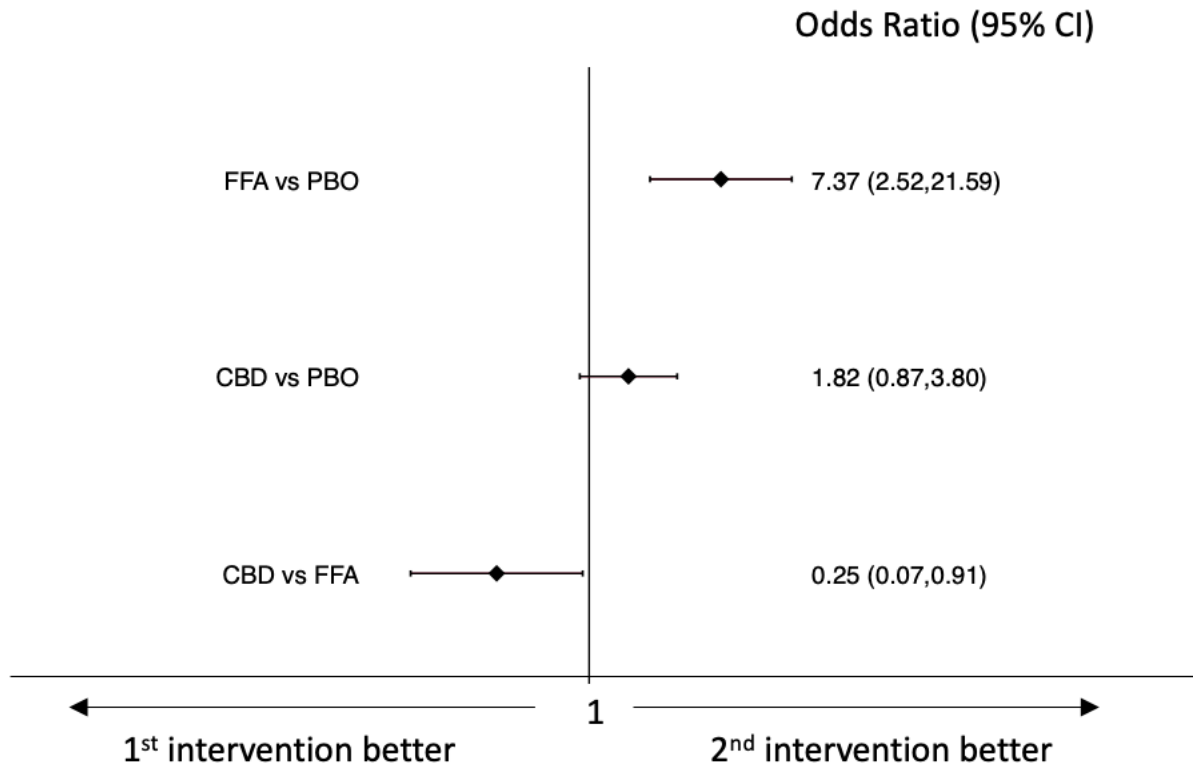

Abbreviations: CBD=pharmaceutical-grade cannabidiol, CI=confidence interval, FFA=fenfluramine hydrochloride, PBO=placebo.

**Figure e-14. Interval plot for the tolerability outcome in trials with a maintenance period of at least 12 weeks: occurrence of serious adverse events**

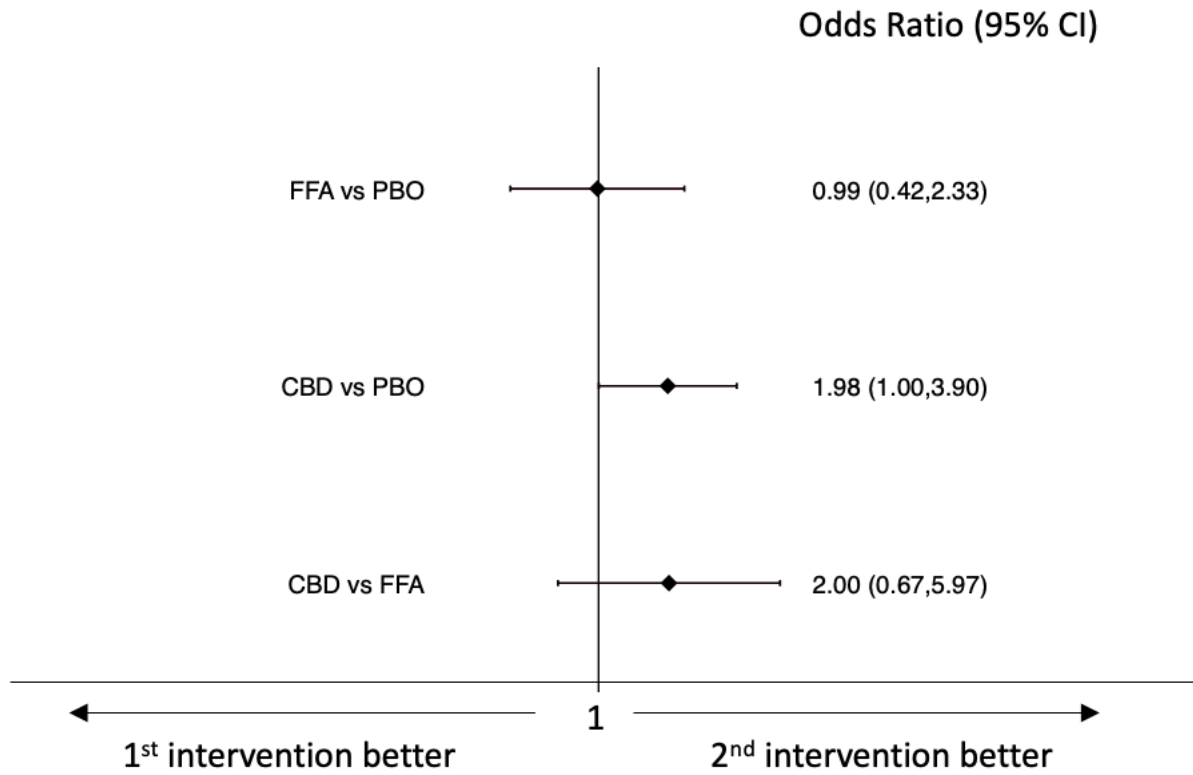

Abbreviations: CBD=pharmaceutical-grade cannabidiol, CI=confidence interval, FFA=fenfluramine hydrochloride, PBO=placebo.



**Figure e-15. Interval plot for the global functioning outcome in trials with a maintenance period of at least 12 weeks: improvement at caregiver-reported Clinical Global Impression of Change**

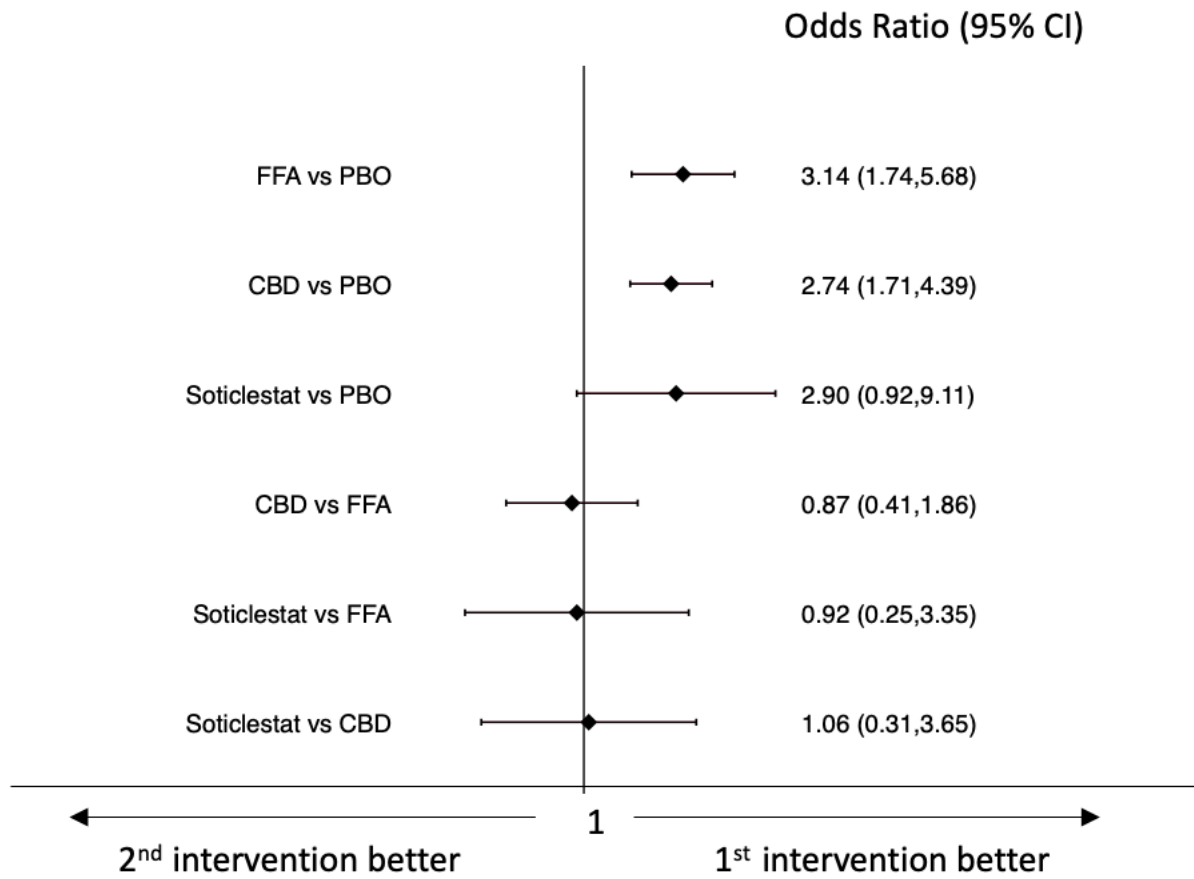

Abbreviations: CBD=pharmaceutical-grade cannabidiol, CI=confidence interval, FFA=fenfluramine hydrochloride, PBO=placebo.

## **Appendix I. Search strategy**

### **PubMed search strategy**

The strategy was based on the Cochrane Highly Sensitive Search Strategy for identifying randomized trials.<sup>e-1</sup>

- #1 random\* OR placebo OR trial\* OR group\* [Title/Abstract]
- #2 "Randomized Controlled Trial"[Publication Type]
- #3 "Controlled Clinical Trial"[Publication Type]
- #4 ((#1) OR #2) OR #3
- #5 "Animals"[Mesh] NOT "Humans"[Mesh]
- #6 #4 NOT #5
- #7 severe myoclonic epilepsy in infancy OR Dravet syndrome [Title/Abstract]
- #8 epilep\* OR seizure [Title/Abstract]
- #9 #7 AND #8
- #10 #6 AND #9

### **EMBASE search strategy**

('severe myoclonic epilepsy in infancy'/exp OR 'severe myoclonic epilepsy in infancy' OR 'dravet syndrome') AND ('epilepsy'/exp OR epilepsy OR 'seizure, epilepsy and convulsion'/exp OR 'seizure, epilepsy and convulsion') AND 'randomized controlled trial'/de NOT medline

### **CENTRAL search strategy**

(severe myoclonic epilepsy in infancy OR Dravet syndrome) AND (epilep\* OR seizure) in Title, Abstract, Keywords

### **ClinicalTrials.gov search strategy**

severe myoclonic epilepsy in infancy OR Dravet syndrome | epilepsy OR seizure | Interventional Studies

## Appendix II. Assessment of the confidence in the network estimates by outcome

### Seizure response

| Comparison         | Number of Studies | Within-study bias | Reporting bias | Indirectness | Imprecision    | Heterogeneity  | Incoherence   | Confidence rating |
|--------------------|-------------------|-------------------|----------------|--------------|----------------|----------------|---------------|-------------------|
| Mixed evidence     |                   |                   |                |              |                |                |               |                   |
| CBD vs PBO         | 2                 | No concerns       | Low risk       | No concerns  | No concerns    | Some concerns  | Some concerns | Moderate          |
| FFA vs PBO         | 2                 | No concerns       | Low risk       | No concerns  | No concerns    | No concerns    | Some concerns | Moderate          |
| PBO vs SOTICLESTAT | 1                 | No concerns       | Low risk       | No concerns  | No concerns    | Major concerns | Some concerns | Low               |
| PBO vs STP         | 2                 | Some concerns     | Low risk       | No concerns  | No concerns    | Some concerns  | Some concerns | Moderate          |
| Indirect evidence  |                   |                   |                |              |                |                |               |                   |
| CBD vs FFA         | --                | No concerns       | Low risk       | No concerns  | No concerns    | Some concerns  | Some concerns | Moderate          |
| CBD vs SOTICLESTAT | --                | No concerns       | Low risk       | No concerns  | Some concerns  | Some concerns  | Some concerns | Moderate          |
| CBD vs STP         | --                | Some concerns     | Low risk       | No concerns  | No concerns    | Some concerns  | Some concerns | Moderate          |
| FFA vs SOTICLESTAT | --                | No concerns       | Low risk       | No concerns  | Major concerns | No concerns    | Some concerns | Low               |
| FFA vs STP         | --                | Some concerns     | Low risk       | No concerns  | Some concerns  | Some concerns  | Some concerns | Moderate          |
| SOTICLESTAT vs STP | --                | Some concerns     | Low risk       | No concerns  | Major concerns | No concerns    | Some concerns | Low               |

### Seizure freedom

| Comparison         | Number of Studies | Within-study bias | Reporting bias | Indirectness | Imprecision    | Heterogeneity  | Incoherence   | Confidence rating |
|--------------------|-------------------|-------------------|----------------|--------------|----------------|----------------|---------------|-------------------|
| Mixed evidence     |                   |                   |                |              |                |                |               |                   |
| CBD vs PBO         | 2                 | No concerns       | Low risk       | No concerns  | Some concerns  | Some concerns  | Some concerns | Moderate          |
| FFA vs PBO         | 2                 | No concerns       | Low risk       | No concerns  | Some concerns  | Some concerns  | Some concerns | Moderate          |
| PBO vs SOTICLESTAT | 1                 | No concerns       | Low risk       | No concerns  | Major concerns | No concerns    | Some concerns | Low               |
| PBO vs STP         | 2                 | Some concerns     | Low risk       | No concerns  | No concerns    | Major concerns | Some concerns | Low               |
| Indirect evidence  |                   |                   |                |              |                |                |               |                   |
| CBD vs FFA         | --                | No concerns       | Low risk       | No concerns  | Major concerns | No concerns    | Some concerns | Low               |
| CBD vs SOTICLESTAT | --                | No concerns       | Low risk       | No concerns  | Major concerns | No concerns    | Some concerns | Low               |
| CBD vs STP         | --                | Some concerns     | Low risk       | No concerns  | Some concerns  | Some concerns  | Some concerns | Moderate          |
| FFA vs SOTICLESTAT | --                | No concerns       | Low risk       | No concerns  | Major concerns | No concerns    | Some concerns | Low               |
| FFA vs STP         | --                | Some concerns     | Low risk       | No concerns  | Major concerns | No concerns    | Some concerns | Low               |
| SOTICLESTAT vs STP | --                | Some concerns     | Low risk       | No concerns  | Major concerns | No concerns    | Some concerns | Low               |

*Discontinuation for any reason*

| Comparison         | Number of Studies | Within-study bias | Reporting bias | Indirectness | Imprecision    | Heterogeneity | Incoherence   | Confidence rating |
|--------------------|-------------------|-------------------|----------------|--------------|----------------|---------------|---------------|-------------------|
| Mixed evidence     |                   |                   |                |              |                |               |               |                   |
| CBD vs PBO         | 3                 | No concerns       | Low risk       | No concerns  | No concerns    | Some concerns | Some concerns | Moderate          |
| FFA vs PBO         | 2                 | No concerns       | Low risk       | No concerns  | Some concerns  | Some concerns | Some concerns | Moderate          |
| PBO vs SOTICLESTAT | 1                 | No concerns       | Low risk       | No concerns  | Major concerns | No concerns   | Some concerns | Low               |
| PBO vs STP         | 2                 | Some concerns     | Low risk       | No concerns  | Some concerns  | Some concerns | Some concerns | Moderate          |
| Indirect evidence  |                   |                   |                |              |                |               |               |                   |
| CBD vs FFA         | --                | No concerns       | Low risk       | No concerns  | Some concerns  | Some concerns | Some concerns | Moderate          |
| CBD vs SOTICLESTAT | --                | No concerns       | Low risk       | No concerns  | Some concerns  | Some concerns | Some concerns | Moderate          |
| CBD vs STP         | --                | Some concerns     | Low risk       | No concerns  | No concerns    | Some concerns | Some concerns | Moderate          |
| FFA vs SOTICLESTAT | --                | No concerns       | Low risk       | No concerns  | Major concerns | No concerns   | Some concerns | Low               |
| FFA vs STP         | --                | Some concerns     | Low risk       | No concerns  | Some concerns  | Some concerns | Some concerns | Moderate          |
| SOTICLESTAT vs STP | --                | Some concerns     | Low risk       | No concerns  | Major concerns | No concerns   | Some concerns | Low               |

*Discontinuation for adverse events*

| Comparison         | Number of Studies | Within-study bias | Reporting bias | Indirectness | Imprecision    | Heterogeneity | Incoherence   | Confidence rating |
|--------------------|-------------------|-------------------|----------------|--------------|----------------|---------------|---------------|-------------------|
| Mixed evidence     |                   |                   |                |              |                |               |               |                   |
| CBD vs PBO         | 3                 | No concerns       | Low risk       | No concerns  | No concerns    | Some concerns | Some concerns | Moderate          |
| FFA vs PBO         | 2                 | No concerns       | Low risk       | No concerns  | Some concerns  | Some concerns | Some concerns | Moderate          |
| PBO vs SOTICLESTAT | 1                 | No concerns       | Low risk       | No concerns  | Major concerns | No concerns   | Some concerns | Low               |
| PBO vs STP         | 2                 | Some concerns     | Low risk       | No concerns  | Major concerns | No concerns   | Some concerns | Low               |
| Indirect evidence  |                   |                   |                |              |                |               |               |                   |
| CBD vs FFA         | --                | No concerns       | Low risk       | No concerns  | Major concerns | No concerns   | Some concerns | Low               |
| CBD vs SOTICLESTAT | --                | No concerns       | Low risk       | No concerns  | Major concerns | No concerns   | Some concerns | Low               |
| CBD vs STP         | --                | Some concerns     | Low risk       | No concerns  | Some concerns  | Some concerns | Some concerns | Moderate          |
| FFA vs SOTICLESTAT | --                | No concerns       | Low risk       | No concerns  | Major concerns | No concerns   | Some concerns | Low               |
| FFA vs STP         | --                | Some concerns     | Low risk       | No concerns  | Major concerns | No concerns   | Some concerns | Low               |
| SOTICLESTAT vs STP | --                | Some concerns     | Low risk       | No concerns  | Major concerns | No concerns   | Some concerns | Low               |

## Occurrence of adverse events

| Comparison        | Number of Studies | Within-study bias | Reporting bias | Indirectness | Imprecision   | Heterogeneity  | Incoherence   | Confidence rating |
|-------------------|-------------------|-------------------|----------------|--------------|---------------|----------------|---------------|-------------------|
| Mixed evidence    |                   |                   |                |              |               |                |               |                   |
| CBD vs PBO        | 3                 | No concerns       | Low risk       | No concerns  | Some concerns | Some concerns  | Some concerns | Moderate          |
| FFA vs PBO        | 2                 | No concerns       | Low risk       | No concerns  | No concerns   | Major concerns | Some concerns | Low               |
| PBO vs STP        | 1                 | Some concerns     | Low risk       | No concerns  | No concerns   | Major concerns | Some concerns | Low               |
| Indirect evidence |                   |                   |                |              |               |                |               |                   |
| CBD vs FFA        | --                | No concerns       | Low risk       | No concerns  | No concerns   | Major concerns | Some concerns | Low               |
| CBD vs STP        | --                | No concerns       | Low risk       | No concerns  | No concerns   | Major concerns | Some concerns | Low               |
| FFA vs STP        | --                | Some concerns     | Low risk       | No concerns  | Some concerns | Some concerns  | Some concerns | Moderate          |

## Occurrence of serious adverse events

| Comparison        | Number of Studies | Within-study bias | Reporting bias | Indirectness | Imprecision    | Heterogeneity  | Incoherence   | Confidence rating |
|-------------------|-------------------|-------------------|----------------|--------------|----------------|----------------|---------------|-------------------|
| Mixed evidence    |                   |                   |                |              |                |                |               |                   |
| CBD vs PBO        | 3                 | No concerns       | Low risk       | No concerns  | Some concerns  | No concerns    | Some concerns | Moderate          |
| FFA vs PBO        | 2                 | No concerns       | Low risk       | No concerns  | No concerns    | Major concerns | Some concerns | Low               |
| PBO vs STP        | 2                 | Some concerns     | Low risk       | No concerns  | Major concerns | No concerns    | Some concerns | Low               |
| Indirect evidence |                   |                   |                |              |                |                |               |                   |
| CBD vs FFA        | --                | No concerns       | Low risk       | No concerns  | Some concerns  | Some concerns  | Some concerns | Moderate          |
| CBD vs STP        | --                | Some concerns     | Low risk       | No concerns  | Some concerns  | Some concerns  | Some concerns | Moderate          |
| FFA vs STP        | --                | Some concerns     | Low risk       | No concerns  | Major concerns | No concerns    | Some concerns | Low               |

## Improvement at caregiver-reported Clinical Global Impression of Change

| Comparison         | Number of Studies | Within-study bias | Reporting bias | Indirectness | Imprecision    | Heterogeneity  | Incoherence   | Confidence rating |
|--------------------|-------------------|-------------------|----------------|--------------|----------------|----------------|---------------|-------------------|
| Mixed evidence     |                   |                   |                |              |                |                |               |                   |
| CBD vs PBO         | 2                 | No concerns       | Low risk       | No concerns  | No concerns    | Major concerns | Some concerns | Low               |
| FFA vs PBO         | 2                 | No concerns       | Low risk       | No concerns  | No concerns    | Major concerns | Some concerns | Low               |
| PBO vs Soticlestat | 1                 | No concerns       | Low risk       | No concerns  | Some concerns  | Some concerns  | Some concerns | Moderate          |
| Indirect evidence  |                   |                   |                |              |                |                |               |                   |
| CBD vs FFA         | --                | No concerns       | Low risk       | No concerns  | No concerns    | Major concerns | Some concerns | Low               |
| CBD vs Soticlestat | --                | No concerns       | Low risk       | No concerns  | Major concerns | No concerns    | Some concerns | Low               |
| FFA vs Soticlestat | --                | No concerns       | Low risk       | No concerns  | Major concerns | No concerns    | Some concerns | Low               |

Rating of the confidence in the network estimates for each drug by outcome is shown. We used the web application CINeMA (<https://cinema.ispm.unibe.ch/>) and derived the judgment for each item and the overall confidence rating for each network estimate as described by Papakonstantinou and colleagues.<sup>6-2</sup> We used the *average risk of bias* to summarize risk of bias across contributions for each network estimate and derive the judgment for within-study bias. We used the *majority* criterion to assess the indirectness and judged all comparisons as with *no concerns*. For the assessment of imprecision and heterogeneity, we considered an odds ratio of 3.0 as clinically important for the outcomes. For the assessment of the confidence in the estimates for incoherence, we judged all comparisons as with *some concerns* because of the unavailability of indirect evidence. We rated overall confidence as *moderate* if at least one domain was judged as *some concerns* but no domains were judged as *major concerns*, and as *low* if one single domain was judged as *major concerns*. Abbreviations: CBD=pharmaceutical-grade cannabidiol, FFA=fenfluramine hydrochloride, PBO=placebo, STP=stiripentol.

## **e-Reference**

e-1 Lefebvre C, Manheimer E, Glanville J. Chapter 6: Searching for studies. In: Higgins JPT, Green S (editors). *Cochrane Handbook for Systematic Reviews of Interventions Version 5.0.2* (updated September 2009). The Cochrane Collaboration, 2009. Available from [www.cochranehandbook.org](http://www.cochranehandbook.org).

e-2 Nikolakopoulou A, Higgins JPT, Papakonstantinou T, Chaimani A, Del Giovane C, Egger M, Salanti G. CINeMA: an approach for assessing confidence in the results of a network meta-analysis. *PLoS Med.* 2020;17:e1003082.
